# Supplementary material for: Lysine Distinctively Manipulates Myogenic Regulatory Factors and Wnt/Ca2+ Pathway in Slow and Fast Muscles, and Their Satellite Cells of Postnatal Piglets
Source: MDPI journal article supplement (doi:10.3390/cells13070650), 2024-04-08
Supplement: s1 [file s1]

Table S1 Ingredient composition and nutritional levels of the diets (air-dry basis)

| Item                          | Content, %  |                |
|-------------------------------|-------------|----------------|
|                               | Control     | Lys Deficiency |
| Ingredients                   |             |                |
| Corn                          | 33.66       | 33.90          |
| Soybean meal                  | 24.00       | 24.00          |
| Extruded corn                 | 20.00       | 20.00          |
| Flour                         | 10.00       | 10.00          |
| Fermented soybean meal        | 4.00        | 4.00           |
| Soybean oil                   | 2.00        | 2.00           |
| Dicalcium phosphate           | 0.80        | 0.80           |
| Limestone power               | 0.72        | 0.85           |
| Mildew preventive             | 0.05        | 0.05           |
| Sodium chloride               | 0.40        | 0.40           |
| <b>L-Lysine hydrochloride</b> | <b>0.37</b> | <b>0.00</b>    |
| Premix <sup>1</sup>           | 4.00        | 4.00           |
| Total                         | 100.00      | 100.00         |
| Nutritional levels            |             |                |
| Digestible energy, MJ/kg      | 14.23       | 14.23          |
| Crude protein <sup>2</sup>    | 19.15       | 19.13          |
| <b>Lysine</b>                 | <b>1.30</b> | <b>0.86</b>    |
| Methionine + cystine          | 0.58        | 0.58           |
| Threonine                     | 0.71        | 0.71           |
| Tryptophan                    | 0.23        | 0.23           |
| Calcium                       | 0.53        | 0.53           |
| Phosphorus                    | 0.47        | 0.47           |

<sup>1</sup> The premix provided the following nutrients per kilogram of diet: Fe 101.00 mg; Cu 15.00 mg; Mn 42.00 mg; Zn 102.00 mg; I 0.60 mg; Se 0.30 mg; VA 10500.00 IU; VD<sub>3</sub> 2100.00 IU; VK<sub>3</sub> 3.50 mg; VB<sub>1</sub> 2.24 mg; VB<sub>2</sub> 9.80 mg; VB<sub>6</sub> 2.80 mg; VB<sub>12</sub> 0.05 mg; Folic acid 1.04 mg; Niacin 35.00 mg.

<sup>2</sup> Crude protein was analyzed. Other values were calculated.

Table S2. Primary and secondary antibodies used in the Western blotting

| <b>Antibody/type</b>           | <b>Source</b> | <b>Manufacturer</b>      | <b>Catalogue number</b> |
|--------------------------------|---------------|--------------------------|-------------------------|
| CaMKII/primary                 | Rabbit        | Sangon                   | D120336                 |
| CaN/primary                    | Rabbit        | Sangon                   | D122013                 |
| PKC/primary                    | Rabbit        | Sangon                   | D121794                 |
| NFATc1/primary                 | Mouse         | Santa Cruz Biotechnology | sc-7294                 |
| MyoD/primary                   | Rabbit        | Santa Cruz Biotechnology | sc-304                  |
| Myogenin/primary               | Rabbit        | Santa Cruz Biotechnology | sc-12732                |
| MRF4/primary                   | Mouse         | Santa Cruz Biotechnology | sc-514379               |
| MyHC/primary                   | Rabbit        | Santa Cruz Biotechnology | sc-376157               |
| $\beta$ -actin/primary         | Mouse         | Santa Cruz Biotechnology | sc-8432                 |
| Goat Anti-Rabbit IgG/secondary | -             | Earthox LLC              | #E030120                |
| Goat Anti-Mouse IgG/secondary  | -             | Earthox LLC              | #E030110                |

Table S3. Primary and secondary antibodies used in the Immunofluorescence staining.

| <b>Antibody</b>  | <b>Source</b> | <b>Manufacturer</b>      | <b>Catalogue number</b> |
|------------------|---------------|--------------------------|-------------------------|
| MyoD/primary     | Rabbit        | Santa Cruz Biotechnology | sc-304                  |
| CaN/primary      | Rabbit        | Sangon                   | D122013                 |
| Goat Anti-Mouse  |               |                          |                         |
| IgG/secondary    | -             | Jackson                  | 115-545-003             |
| Goat Anti-Rabbit |               |                          |                         |
| IgG/secondary    | -             | Jackson                  | 111-165-045             |
